# Supplementary material for: Novel fluorescent organic nanoparticles as a label-free biosensor for dopamine in serum
Source: Royal Society of Chemistry journal article supplement (doi:10.1039/c6tb03077g), 2017-01-01
Supplement: c6tb03077g1.pdf [file c6tb03077g1.pdf]

Supporting Information for:

## Novel Fluorescent Organic Nanoparticles as Label-free Biosensor for Dopamine in Serum

Lu Ding, Zhenwen Qin, Chunlan Xiang, Gang Zhou\*

Lab of Advanced Materials, Collaborative Innovation Center of Chemistry for Energy  
Materials, Fudan University, Shanghai 200438, P. R. China

\*Corresponding author: E-mail: [zhougang@fudan.edu.cn](mailto:zhougang@fudan.edu.cn), Tel/Fax:  
+86-21-5163-0350.

**Fig. S1.** PL spectrum of C2-F127 FONs in aqueous solution. Inset illustrates the photo-stability of the FONs over a period of 10000 s.

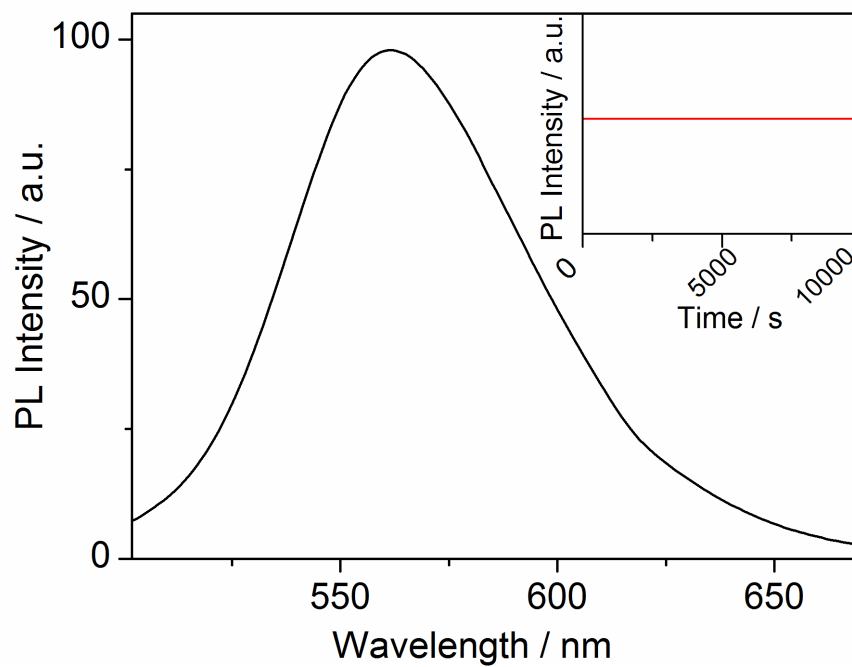

**Fig. S2.** TEM image of the aggregated C2-F127@PDA after centrifugation treatment.

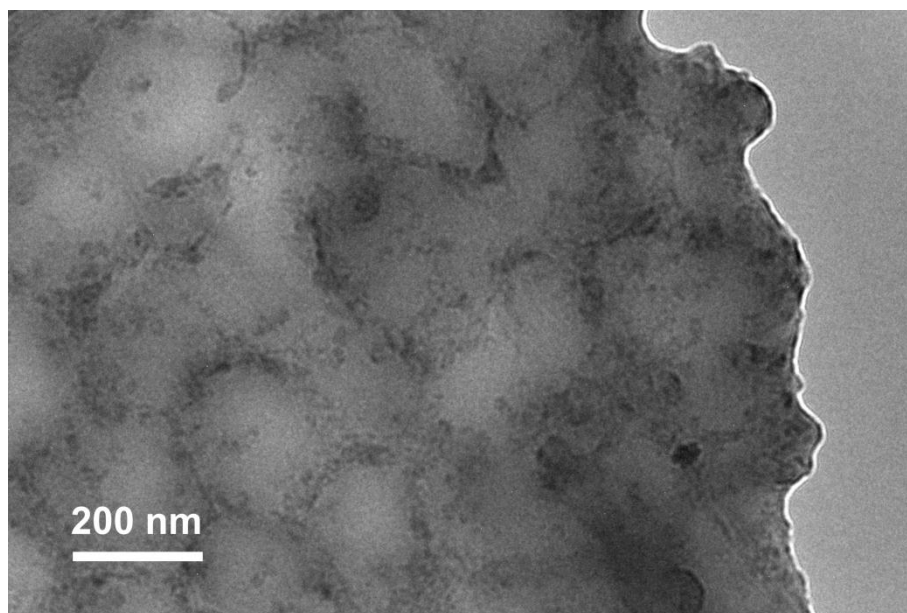

### Calcalaton of the detection limit.<sup>S1</sup>

To calculate the limit of detection (LoD), the limit of blank (LoB) is first calculated. LoB is the highest apparent analyte concentration expected to be found when replicates of a blank sample containing no analyte are tested.

$$\text{LoB} = \text{mean}_{\text{blank}} + 1.645(\text{SD}_{\text{blank}}) \quad (1)$$

The  $\text{mean}_{\text{blank}}$  is the mean of the blank and  $\text{SD}_{\text{blank}}$  is the standard deviation of the blank. The  $\text{SD}_{\text{blank}}$  is calculated to be 0.0016 and the  $\text{mean}_{\text{blank}}$  is 0.026  $\mu\text{M}$ . Therefore, the LoB is calculated to be 0.029  $\mu\text{M}$  from eqn (1).

LoD is the lowest analyte concentration likely to be reliably distinguished from the LoB and at which detection is feasible.

$$\text{LoD} = \text{LoB} + 1.645(\text{SD}_{\text{low concentration sample}}) \quad (2)$$

The  $\text{SD}_{\text{low concentration sample}}$  is calculated to be 0.0034. The LoD is thus calculated to be 0.035  $\mu\text{M}$  from eqn (2).

The limit of quantification (LoQ) can be defined as the lowest concentration of a sample that can still be quantified with acceptable precision and accuracy. The acceptance criteria in this “turn-off” fluorescence sensor for the two parameters at LoQ are less than 2% for precision and 2% bias for accuracy. Therefore, the LoQ is calculated to be 100 nM in this work.

### Reference.

S1. D. A. Armbruster and T. Pry, *Clin. Biochem. Rev.*, 2008, **29**, S49-S52.
